# Supplementary material for: Association between Endocrine Therapy and Weight Gain after Breast Cancer Diagnosis among Japanese Patients: A Retrospective Cohort Study
Source: MDPI journal article supplement (doi:10.3390/medsci9030050), 2021-07-12
Supplement: s1 [file s1]

**Table S1.** Measurement timing of each outcomes

|                                      | At diagnosis | Current |
|--------------------------------------|--------------|---------|
| <b>Body mass (Primary outcome)</b>   | ○            | ○       |
| Physical activity                    |              | ○       |
| Dietary intake                       |              | ○       |
| Others (income, smoking habit, etc.) |              | ○       |
